# Supplementary material
Source: publisher site journal article supplement (https://www.dovepress.com/article/300095)
Supplement: Supplementary file 1 [file get_supplementary_file.php]

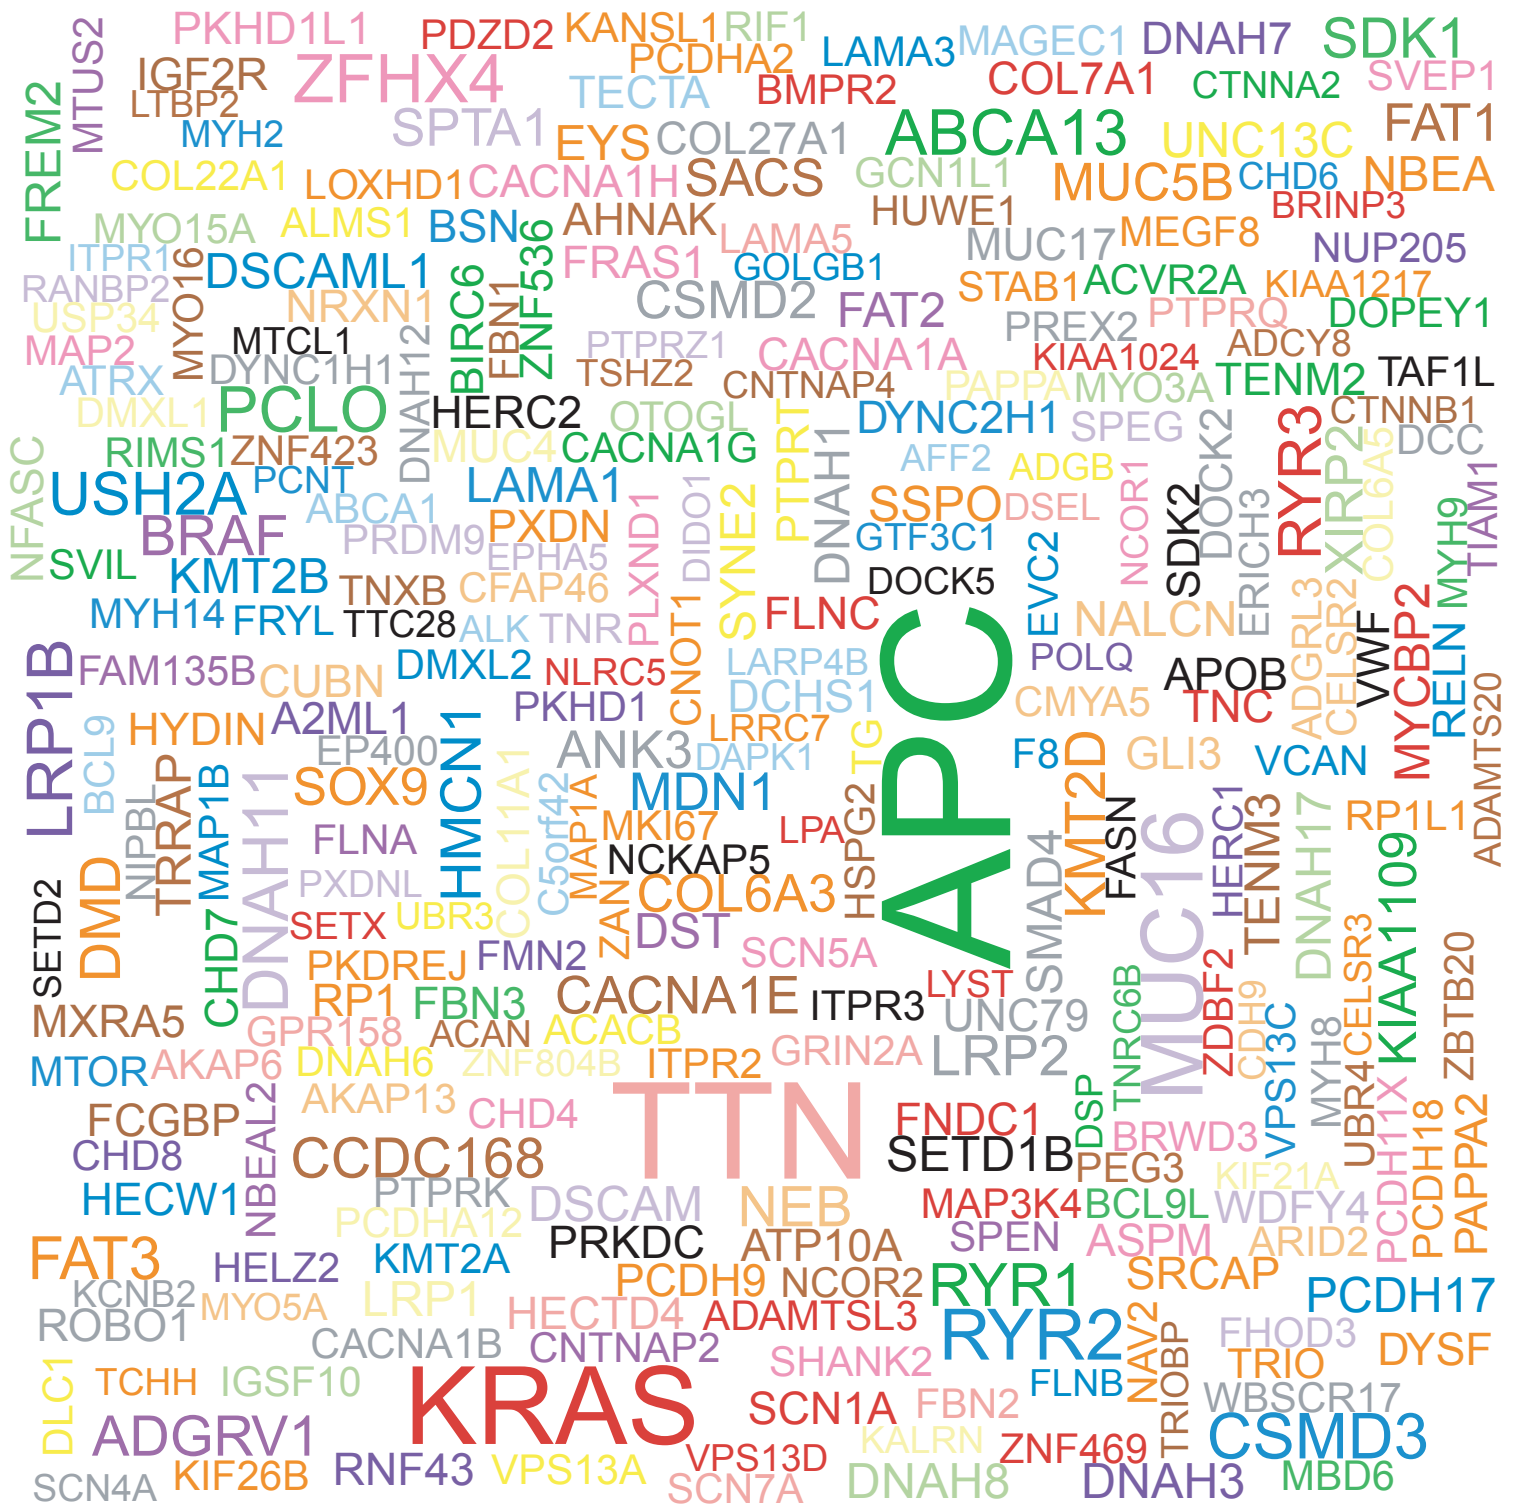

Supplement Figure S1. Genecloud plot showed mutation frequency of genes in colon cancer. The larger the font of the gene represented the higher the mutation frequency of the gene.

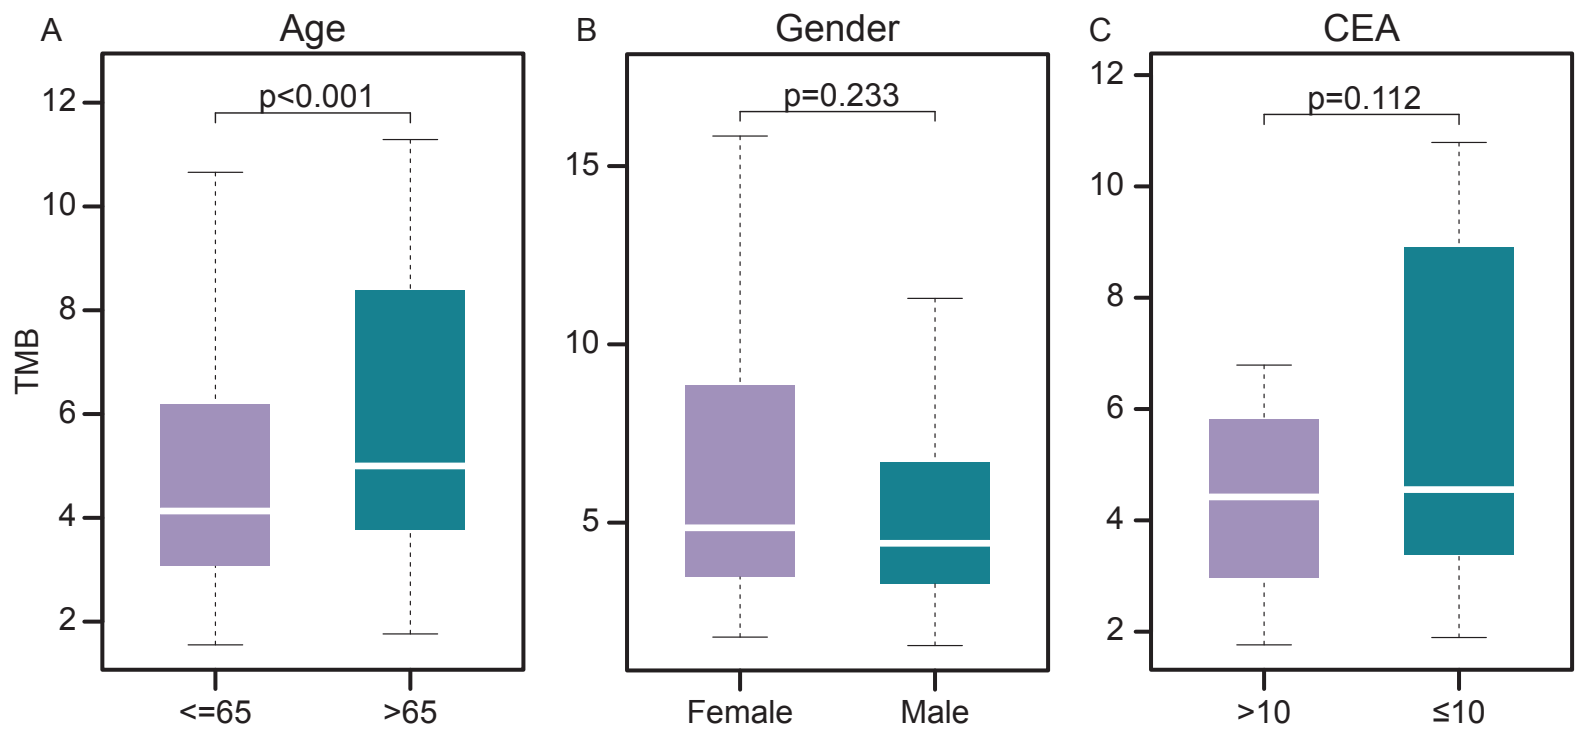

Supplement Figure S2. The association between TMB and clinical features. (A) The association between TMB and age. (B) The association between TMB and gender. (C) The association between TMB and CEA level.

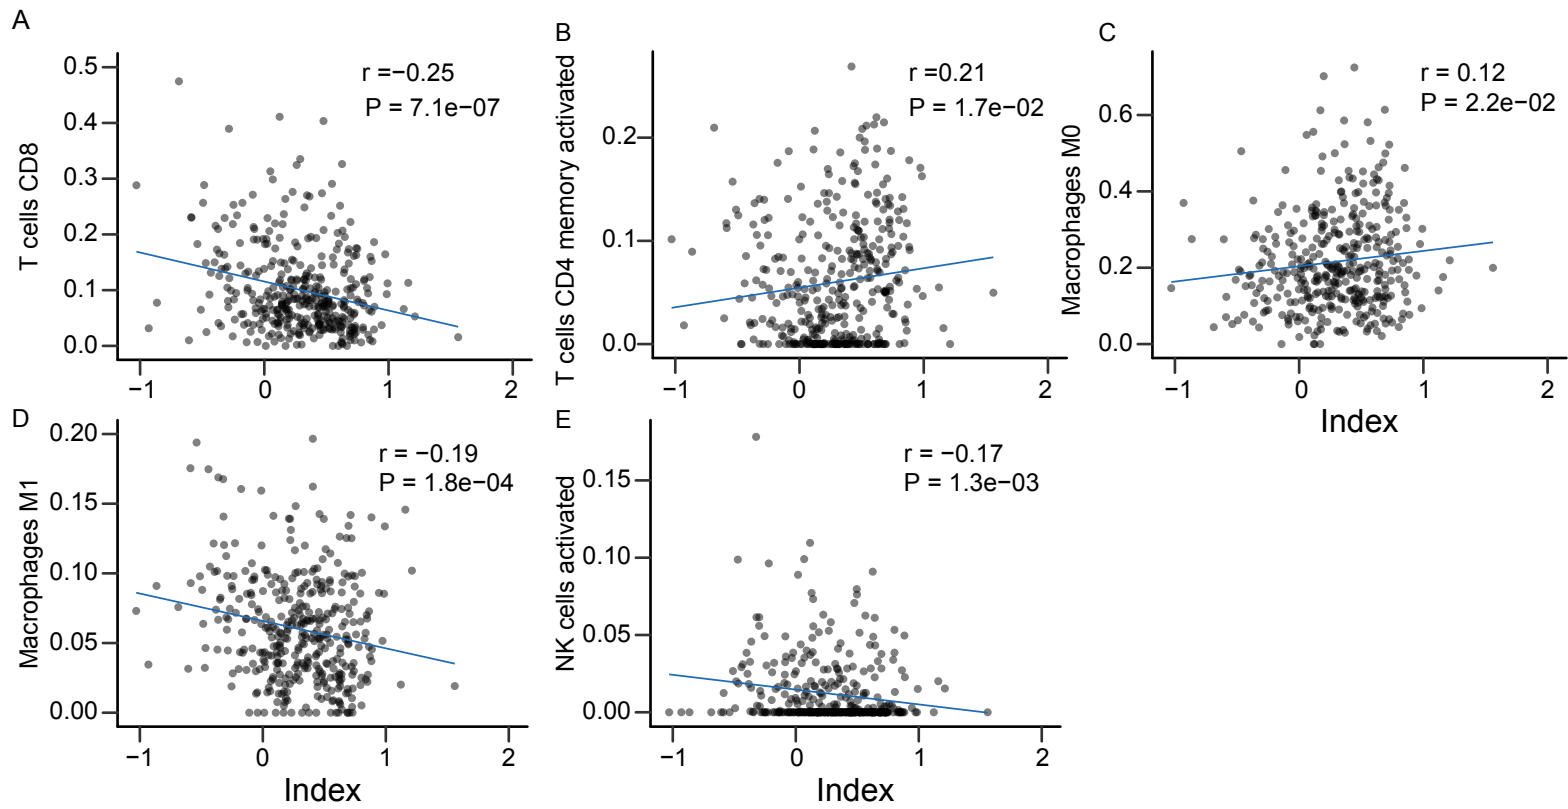

Supplement Figure S3. (A-E) The correlation of classifier index with the infiltration levels of CD8+ T cell, CD4+ memory activated T cell, M0 macrophage, M1 macrophage, and activated NK cell.
